# Supplementary material for: Precursor accumulation on nanocarbons for the synthesis of LaCoO3 nanoparticles as electrocatalysts for oxygen evolution reaction
Source: Royal Society of Chemistry journal article supplement (doi:10.1039/d1ra03762e), 2021-01-01
Supplement: d1ra03762e1.pdf [file d1ra03762e1.pdf]

## Supplementary Information

Precursor Accumulation on Nanocarbons for the Synthesis of  $\text{LaCoO}_3$   
Nanoparticles as Electrocatalysts for Oxygen Evolution Reaction

*Aoi Sakamaki, Hitoshi Ogihara\*, Miru Yoshida-Hirahara, and Hideki Kurokawa*

Graduate School of Science and Engineering, Saitama University, 255 Shimo-Okubo,  
Sakura-ku, Saitama 338-8570, Japan

Email: [ogihara@mail.saitama-u.ac.jp](mailto:ogihara@mail.saitama-u.ac.jp)

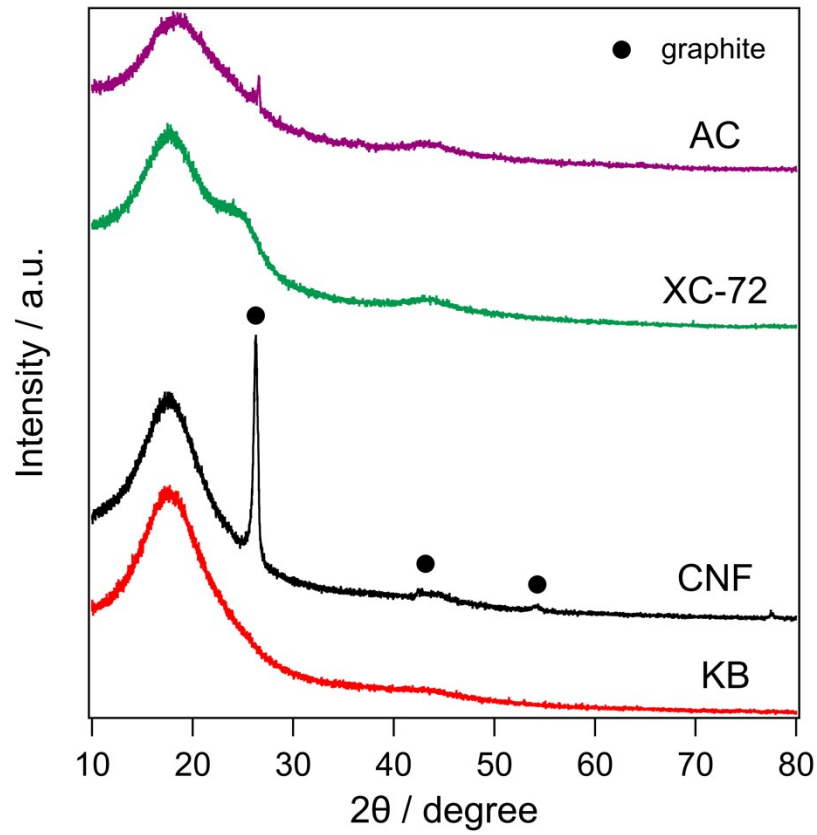

**Fig. S1** XRD patterns of KB, CNF, XC-72, and AC. The graphite peaks are indicated by black dots. The broad peak at ca. 18° is attributed to liquid paraffin used to fix the carbon powder on the sample holder.

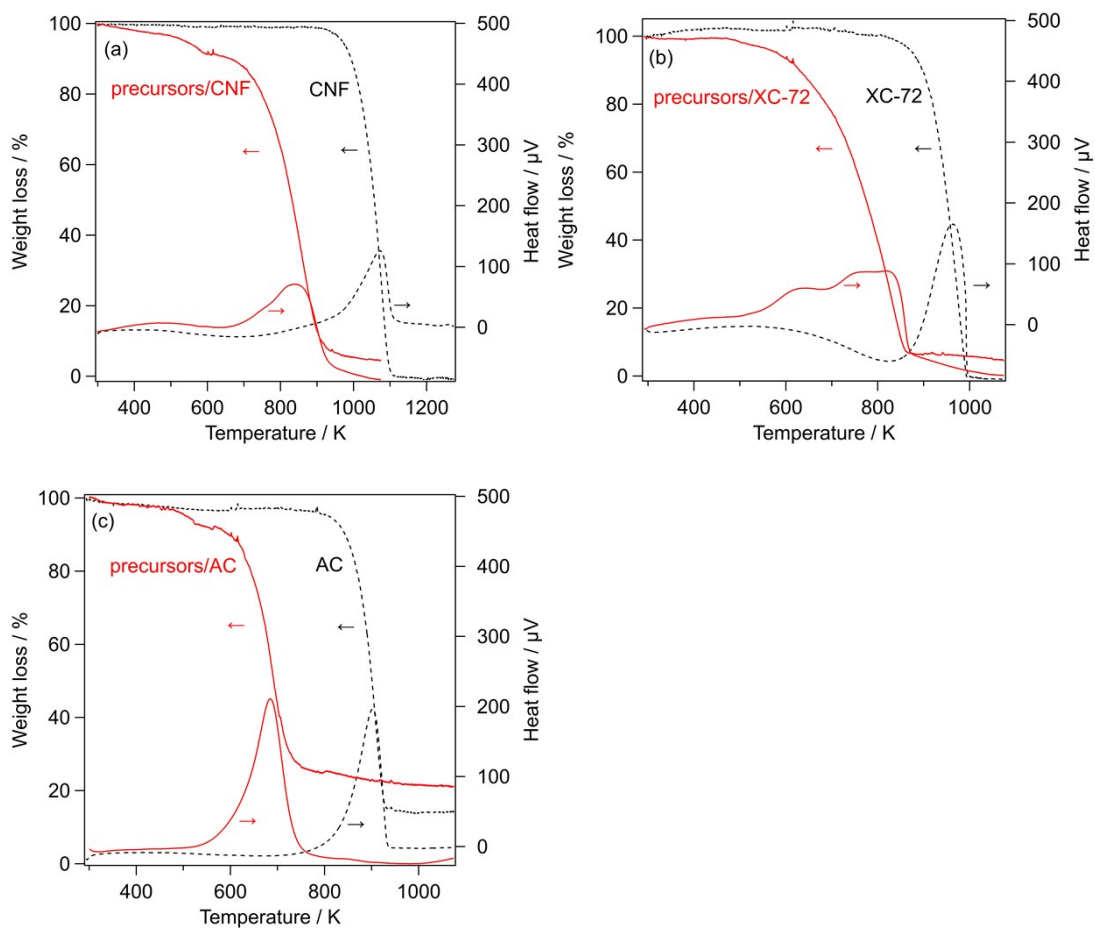

**Fig. S2** TG/DTA curves of carbon supports and precursor/carbon composites (the perovskite precursors were accumulated on the carbon support): (a) CNF, (b) XC-72, and (c) AC. Precursors:  $\text{La}(\text{NO}_3)_3 \cdot 6\text{H}_2\text{O}$  and  $\text{Co}(\text{NO}_3)_2 \cdot 6\text{H}_2\text{O}$ ; Drying temperature for precursor/carbon: 403 K.

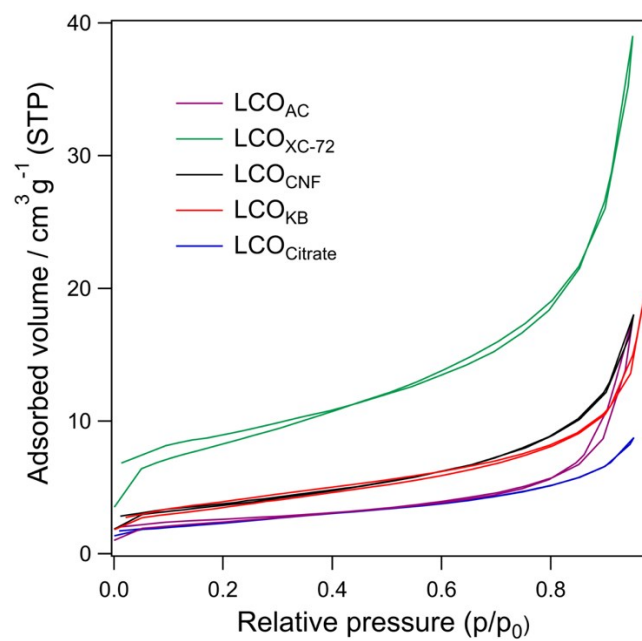

**Fig. S3** Nitrogen adsorption/desorption isotherms of LCO<sub>KB</sub>, LCO<sub>CNF</sub>, LCO<sub>XC-72</sub>, and LCO<sub>AC</sub>.

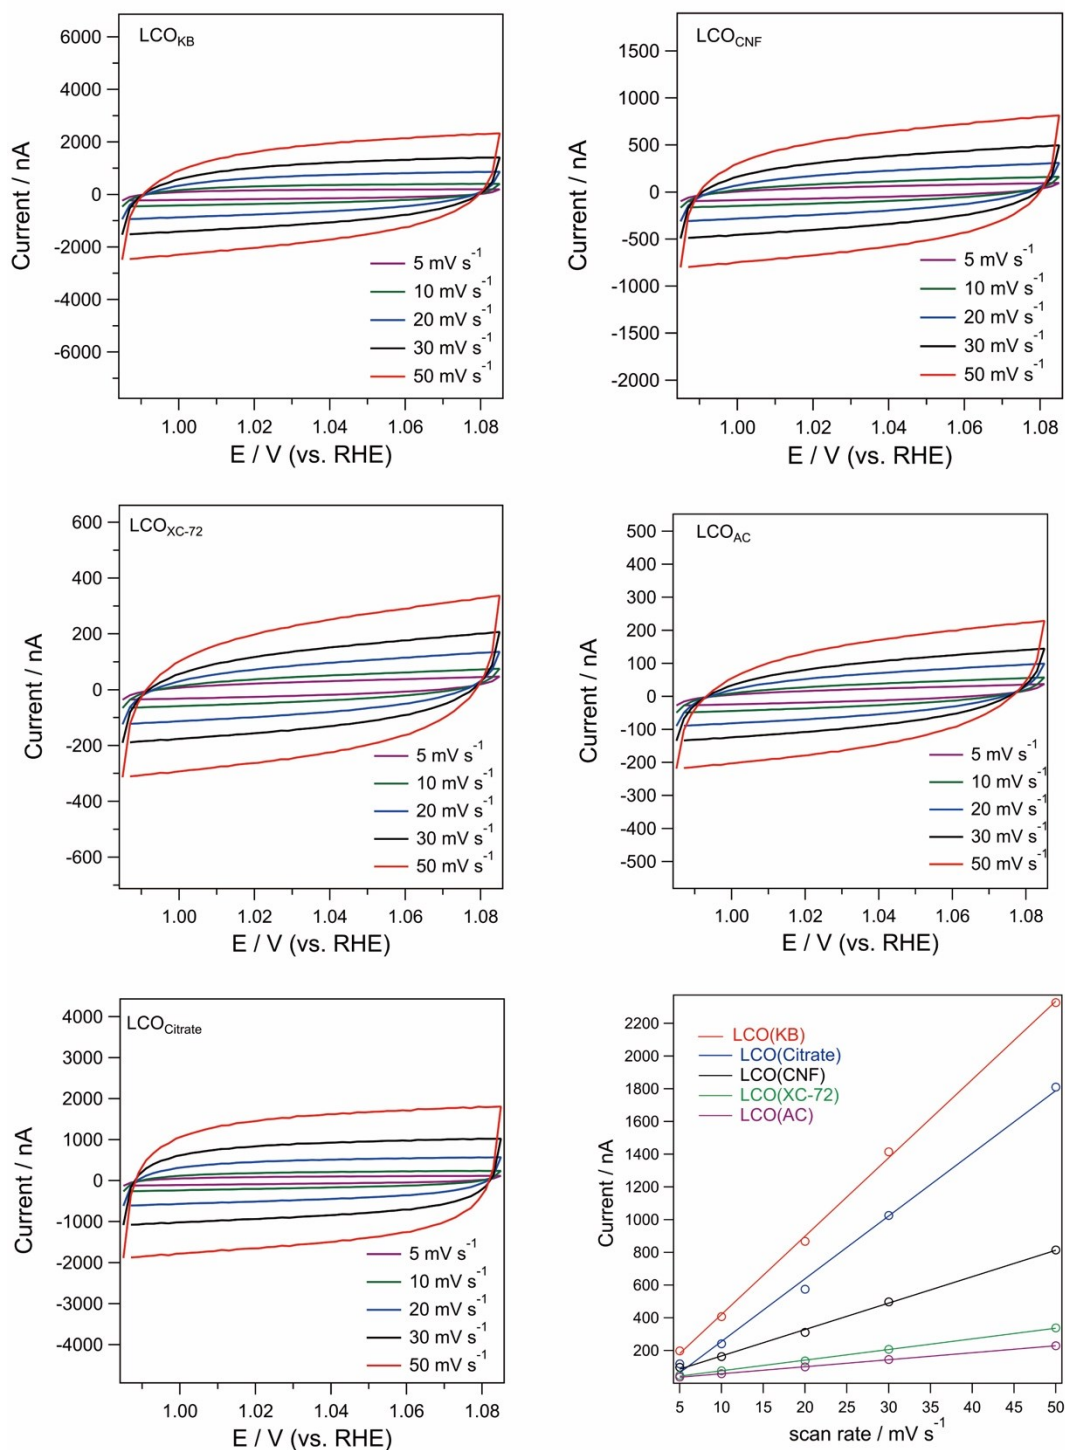

**Fig. S4** CV curves and current-scan rate plots for the measurements of double layer capacitance ( $C_{DL}$ ) to determine the electrochemically active surface area (ECSA) of LMO samples.

**Table S1** OER activity and ECSA for LCO samples.

| Sample                 | onset potential at<br>0.1 mA cm <sup>-2</sup> (V) | Tafel slope<br>(mV dec <sup>-1</sup> ) | ECSA (cm <sup>2</sup> ) |
|------------------------|---------------------------------------------------|----------------------------------------|-------------------------|
| LCO <sub>Citrate</sub> | 1.51                                              | 81                                     | 0.96                    |
| LCO <sub>KB</sub>      | 1.51                                              | 74                                     | 1.2                     |
| LCO <sub>CNF</sub>     | 1.54                                              | 71                                     | 0.4                     |
| LCO <sub>XC-72</sub>   | 1.59                                              | 106                                    | 0.16                    |
| LCO <sub>AC</sub>      | 1.72                                              | 107                                    | 0.11                    |

Electrochemically active surface area (ECSA) of LCO samples was determined by the measurements of electrochemical double layer capacitance ( $C_{DL}$ ). By using the same electrolyte solution as OER tests, CV was measured from 0.1 to 0.2 V vs. Hg/HgO at 5, 10, 20, 30, and 50 mV s<sup>-1</sup>.  $C_{DL}$  was calculated by using the following equation.

$$C_{DL} = I_{DL} / \nu \quad (S1)$$

$I_{DL}$  is the current at 0.2 V vs. Hg/HgO and  $\nu$  is the scan rate. The slope for  $I_{DL}$ - $\nu$  plot gives  $C_{DL}$ . Dividing  $C_{DL}$  by the specific capacitance ( $C_S$ ), ECSA was obtained as shown in Eq S2.

$$ECSA = C_{DL} / C_S \quad (S2)$$

Here, we used  $C_S$  of 0.040 mF cm<sup>-2</sup>.<sup>[1]</sup>

[1] X. Li, H. Wang, Z. Cui, Y. Li, S. Xin, J. Zhou, Y. Long, C. Jin, J. B. Goodenough, *Sci. Adv.* 2019; **5**: eaav6262.

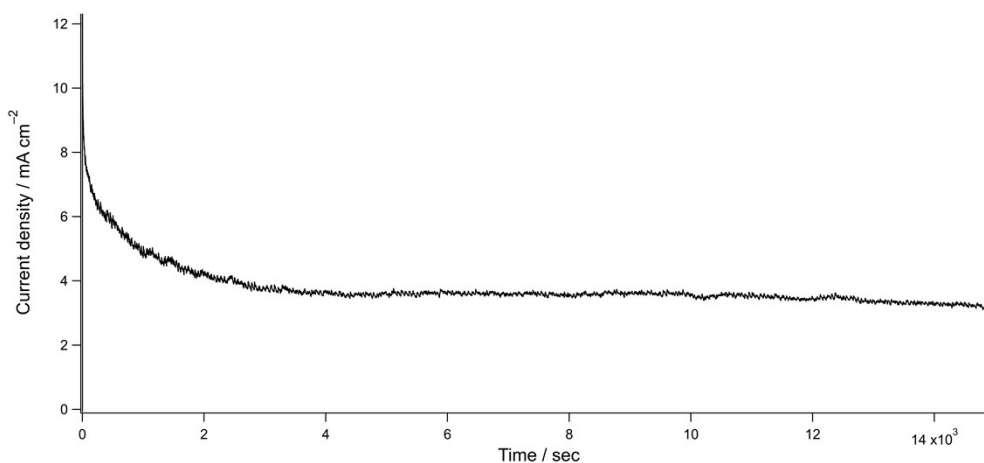

**Fig. S5** Chronoamperometry of LCO<sub>KB</sub> for OER at 1.73 V vs. RHE.

Chronoamperometry was carried out as the following procedure. A glassy carbon disk electrode (0.196 cm<sup>2</sup>), a Hg/HgO electrode (internal solution: 1 M NaOH; +0.118 V vs. reversible hydrogen electrode (RHE)), and a Pt wire were used as the working, reference, and counter electrodes, respectively. A catalyst ink was prepared by sonicating a mixture of LCO<sub>KB</sub> (5 mg), carbon black (1 mg, DENKA Black Li-435; Denka Co. Ltd.), ethanol (0.97 mL), deionized water (30  $\mu$ L), and 5 wt% Nafion perfluorinated resin solution (50  $\mu$ L). Then, 4  $\mu$ L of the catalyst ink was dropped on the glassy carbon disk electrode and dried at room temperature. An O<sub>2</sub>-saturated KOH aqueous solution (0.1 M; pH = 13) was used as the electrolyte. Stable potential at 1.73 V vs. RHE was applied on the working electrode.
